# Supplementary material
Source: MDPI journal article supplement (https://www.mdpi.com/2076-3417/8/12/2414)
Supplement: s1 [file s1]

# Supplementary Materials: 3D Bioprinting Human Induced Pluripotent Stem Cell-Derived Neural Tissues Using a Novel Lab-on-a-Printer Technology

Laura de la Vega, Diego A. Rosas Gómez, Emily Abelseth, Laila Abelseth, Victor Allisson da Silva and Stephanie M. Willerth

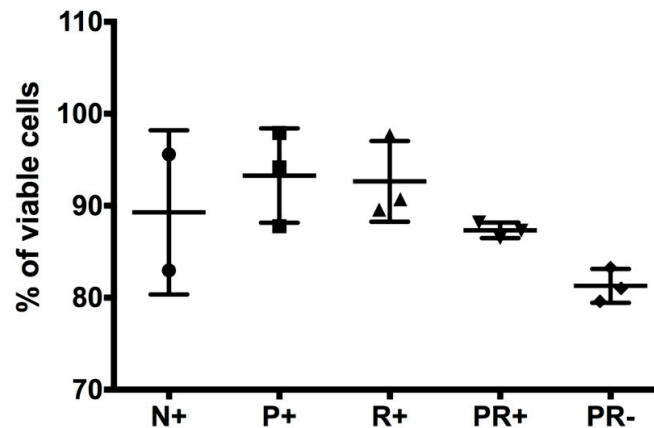

**Figure S1.** Scatter plot representation of cell viability of the NPCs for all groups on day 7 after being bioprinted.  $n=3$  for all groups. Data is reported as the mean with the error bars representing the standard deviation. One-way ANOVA and Tukey post-hoc analysis was performed for statistical analysis using a confidence level of 95% ( $p < 0.05$ ). No statistically significant differences were observed.

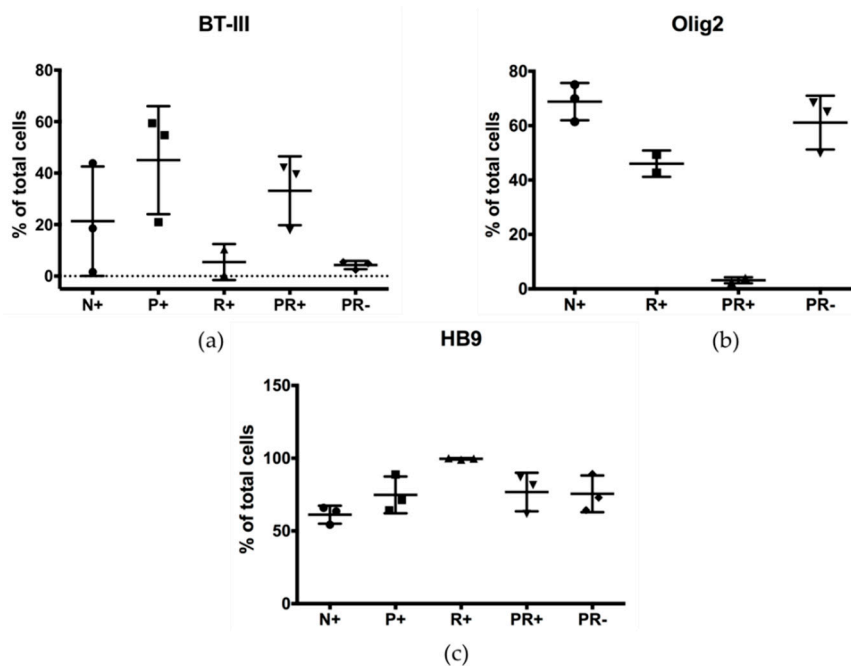

**Figure S2.** Flow cytometry of 3D bioprinted NPCs after 15 days of culture in vitro (a)  $\beta$ t-III; (b) Olig2; (c) HB9.  $n=3$  for all groups. One-way ANOVA and Tukey post-hoc analysis was performed for statistical analysis using a confidence level of 95% ( $p < 0.05$ ) and 99.9% ( $p < 0.001$ ). \* represents  $p < 0.05$  and \*\* 99.9%  $p < 0.001$
